# Supplementary material
Source: publisher site journal article supplement (https://www.dovepress.com/get_supplementary_file.php?f=188364S1.xlsx)
Supplement: Supplementary file 1 [file get_supplementary_file.php]

## Sheet: Table S1
Gene ID	Control FPKM	HJC0152 FPKM	log2(HJC0152/Control)	Qvalue(Control-vs-HJC0152)	Pvalue(Control-vs-HJC0152)	Other Gene ID
100131378	3.23	8.405	1.63489	1.98507e-34	6.38876e-35	C11orf91
100133220	0.365	0.83	1.17969	0.000770619	0.00083635	GOLGA6L3
10023	0.31	0.84	1.42846	1.00961e-06	8.63179e-07	FRAT1
100287036	0.315	1.03	1.65611	9.82269e-05	9.79794e-05	LOC100287036
100381270	6.285	13.945	1.15166	6.99497e-71	1.20813e-71	ZBED6
100507507	19.59	52.61	1.42372	3.2026e-145	2.72829e-146	LOC100507507
100526740	0	0.26	6.71712	1.70777e-13	1.0316e-13	ATP5J2-PTCD1
100526767	0.605	3.17	2.38366	4.14037e-52	9.34339e-53	RNF103-CHMP3
100532731	13.93	35.39	1.3461	3.44524e-261	1.67355e-262	COMMD3-BMI1
100861412	0	0.255	6.67666	3.48211e-13	2.13033e-13	FSBP
100996598	2.15	4.85	1.17304	1.58809e-06	1.3756e-06	LOC100996598
100996643	0.475	1.335	1.38018	9.09333e-06	8.32361e-06	LOC100996643
101060179	0.16	0.935	2.55863	1.83697e-09	1.33392e-09	LOC101060179
10123	12.115	31.915	1.39683	7.46577e-296	3.29984e-297	ARL4C
10124	5.26	16.015	1.61656	8.11226e-143	7.12384e-144	ARL4A
10144	1.295	3.195	1.18014	2.45751e-32	8.3312e-33	FAM13A
10168	3.545	6.395	1.0804	1.9072e-50	4.42352e-51	ZNF197
10170	1.155	10.465	3.16782	7.45678e-106	8.95213e-107	DHRS9
101927245	0.11	0.61	2.33666	0.000574385	0.000614413	LOC101927245
101927262	0.055	0.27	2.23713	7.9643e-05	7.89428e-05	LOC101927262
101928589	0.335	0.825	1.3155	9.97264e-05	9.95624e-05	LOC101928589
101928841	0.64	1.355	1.10662	4.43364e-21	2.05084e-21	LOC101928841
10210	4.83	9.67	1.00888	7.05558e-57	1.46664e-57	TOPORS
10221	74.845	317.355	2.14244	0	0	TRIB1
10253	8.275	79.18	3.26145	0	0	SPRY2
1026	210.51	509.86	1.27616	0	0	CDKN1A
10263	79.185	220.085	1.48318	0	0	CDK2AP2
10265	1.715	3.9	1.18489	6.91165e-16	3.78286e-16	IRX5
102723750	0.15	0.78	2.71695	2.6297e-11	1.74386e-11	LOC102723750
10289	37.885	82.855	1.13005	4.09999e-136	3.7978e-137	EIF1B
1030	10.345	45.215	2.1283	0	0	CDKN2B
1032	3.52	7.485	1.07554	1.20974e-14	6.967e-15	CDKN2D
10365	4.66	21.04	2.17564	3.19014e-252	1.60548e-253	KLF2
10370	35.92	115.23	1.68348	0	0	CITED2
10420	0.955	2.37	1.27301	3.02124e-15	1.6947e-15	TESK2
10435	50.335	215.13	2.09679	0	0	CDC42EP2
10461	3.075	7.135	1.22893	5.63989e-50	1.32374e-50	MERTK
10468	0.67	4.425	2.74214	7.45998e-55	1.60076e-55	FST
10482	39.67	90.085	1.20263	0	0	NXF1
10509	46.485	143.735	1.6184	0	0	SEMA4B
10512	2.965	6	1.01729	1.72661e-44	4.4933e-45	SEMA3C
105373311	1.355	4.365	1.69314	1.47316e-28	5.49916e-29	LOC105373311
105377310	0.89	1.935	1.12026	4.45678e-06	3.98527e-06	LOC105377310
105379417	0.795	2.705	1.77136	9.34376e-19	4.64103e-19	LOC105379417
105379443	0.385	0.945	1.27417	0.000793229	0.000861583	LOC105379443
10569	11.54	26.14	1.13432	1.94354e-113	2.17453e-114	SLU7
10614	19.145	43.86	1.19728	0	0	HEXIM1
10620	12.43	94.98	2.93451	0	0	ARID3B
10628	1.82	5.47	1.5997	1.05956e-46	2.63837e-47	TXNIP
10633	0.065	0.32	2.39119	0.00035386	0.000370261	RASL10A
1066	0.07	0.705	3.32524	6.25235e-11	4.22462e-11	CES1
10769	32.38	87.55	1.43621	0	0	PLK2
10782	9.965	21.43	1.10071	2.86902e-85	4.20606e-86	ZNF274
107983947	0.43	1.93	2.15837	6.1707e-10	4.38458e-10	LOC107983947
107983990	0.07	0.415	2.5383	0.000116277	0.000116662	LOC107983990
107983994	0.335	0.795	1.26278	2.13169e-08	1.63967e-08	LOC107983994
107983997	0.07	0.565	3.02828	3.96245e-10	2.79008e-10	LOC107983997
107984153	0	0.5	6.67979	3.29639e-13	2.01526e-13	LOC107984153
107985428	3.55	10.235	1.52835	1.0289e-93	1.37332e-94	LOC107985428
107986037	1.135	2.96	1.38774	8.33216e-05	8.2747e-05	LOC107986037
107986797	0.125	0.47	1.87981	2.46769e-11	1.63427e-11	LOC107986797
107986982	0.015	0.1	2.89704	0.00053232	0.00056732	LOC107986982
107987285	0	0.16	5.33666	3.71127e-06	3.29697e-06	LOC107987285
107987464	0.01	0.15	3.61772	0.000197821	0.000202344	LOC107987464
107987477	0	0.4	6.35173	6.05846e-11	4.08919e-11	LOC107987477
10891	0.385	1.04	1.52668	1.7446e-16	9.34744e-17	PPARGC1A
10906	9.455	20.305	1.08112	1.13719e-84	1.67544e-85	TRAFD1
10957	5.89	18.39	1.64305	6.97328e-115	7.71048e-116	PNRC1
10974	0.675	4.85	2.85502	1.67848e-19	8.18271e-20	ADIRF
11007	31.355	71.45	1.18942	2.19442e-161	1.70937e-162	CCDC85B
11009	0.4	3.65	3.22477	3.32905e-41	9.22675e-42	IL24
11025	0.04	0.345	3.46723	3.72269e-08	2.90798e-08	LILRB3
11040	10.995	25.445	1.21119	2.78144e-105	3.34734e-106	PIM2
11072	38.39	119.8	1.65087	0	0	DUSP14
11080	2.075	4.49	1.13911	2.65672e-23	1.15139e-23	DNAJB4
11104	9.58	19.8	1.03303	4.81183e-51	1.10622e-51	KATNA1
11151	1.235	2.51	1.09668	1.66737e-08	1.27523e-08	CORO1A
11174	0.025	0.16	2.50016	2.62883e-05	2.49604e-05	ADAMTS6
11199	1.275	3.54	1.47221	4.89775e-14	2.88495e-14	ANXA10
11221	2.095	36.02	4.1022	0	0	DUSP10
114803	4.095	8.215	1.01474	3.747e-90	5.17618e-91	MYSM1
114907	0.215	1.165	2.43477	4.89151e-40	1.38855e-40	FBXO32
114990	2.78	8.12	1.54772	2.0866e-63	3.99041e-64	VASN
115330	0.11	0.485	2.13021	6.83854e-06	6.20682e-06	GPR146
116154	0.015	0.14	3.5997	0.000933443	0.00102423	PHACTR3
1164	95.415	217.995	1.19322	5.74086e-237	3.05665e-238	CKS2
116729	0.175	1.91	3.4477	1.13475e-11	7.39092e-12	PPP1R27
117584	11.93	33.54	1.49294	0	0	RFFL
1191	23.86	94.98	1.99425	0	0	CLU
119392	5.9	11.465	1.04888	9.54993e-29	3.55096e-29	SFR1
1195	19.24	60.38	1.64697	0	0	CLK1
1198	18.82	52.235	1.3672	3.01144e-231	1.62976e-232	CLK3
122618	0.04	0.45	3.43297	1.05555e-07	8.46713e-08	PLD4
1230	0.01	0.15	3.92163	0.000153107	0.000155133	CCR1
1236	0.2	3.27	4.04816	1.06917e-56	2.23027e-57	CCR7
124402	62.565	129.235	1.04804	3.94681e-266	1.86538e-267	UBALD1
124961	0.78	1.82	1.22524	1.32607e-18	6.61751e-19	ZFP3
125206	0.095	0.765	2.96065	6.30454e-11	4.26356e-11	SLC5A10
126147	0.05	0.275	2.41405	0.000367148	0.000384754	NTN5
1263	11.375	26.065	1.19731	3.82511e-119	4.04536e-120	PLK3
126961	0.385	1.745	2.17824	5.58024e-05	5.45029e-05	HIST2H3C
128272	0.135	0.35	1.39325	0.000725003	0.000783984	ARHGEF19
1292	0.015	0.13	3.01474	0.000418274	0.000440762	COL6A2
1298	0.01	0.495	5.68716	1.55776e-13	9.40076e-14	COL9A2
13	0.255	1.135	2.19531	1.65002e-09	1.19601e-09	AADAC
131566	0.105	0.385	1.86621	2.0413e-09	1.48379e-09	DCBLD2
1316	78.55	326.26	2.05568	0	0	KLF6
132158	2.6	5.285	1.03954	2.15872e-15	1.20512e-15	GLYCTK
132720	4.24	12.96	1.61209	1.75164e-101	2.19744e-102	C4orf32
132864	2.085	4.675	1.25615	3.98019e-53	8.81354e-54	CPEB2
135398	10.805	40.98	1.80242	0	0	C6orf141
138716	11.605	29.11	1.26579	1.30902e-54	2.82035e-55	RPP25L
139221	0.24	0.555	1.2542	5.37208e-06	4.82959e-06	MUM1L1
140691	0.07	0.31	2.26266	0.000963215	0.00105872	TRIM69
140767	0.315	0.675	1.10476	0.000529117	0.000563598	NRSN1
1436	0.865	1.815	1.08238	1.52699e-12	9.56251e-13	CSF1R
144110	0.495	2.58	2.38303	1.75102e-46	4.37546e-47	TMEM86A
144233	2.03	5.365	1.40359	6.75947e-42	1.84978e-42	BCDIN3D
145483	0.49	1.005	1.06951	9.60698e-07	8.20239e-07	FAM161B
145741	0.755	4.475	2.57065	1.8093e-81	2.7686e-82	C2CD4A
146691	8.135	16.43	1.01432	3.55938e-133	3.36972e-134	TOM1L2
147040	21.04	58.145	1.46754	0	0	KCTD11
147138	0.345	0.735	1.05098	6.02837e-05	5.9103e-05	TMC8
147808	6.78	14.32	1.08013	4.65848e-45	1.19736e-45	ZNF784
147906	0.42	1.235	1.51921	3.3438e-10	2.34178e-10	DACT3
148014	0.035	0.3	3.5997	0.000933443	0.00102423	TTC9B
1491	0.865	3.42	2.09219	2.59911e-36	8.01502e-37	CTH
149345	0.23	0.805	1.85124	3.44491e-06	3.05431e-06	SHISA4
151	0.11	0.485	2.09002	5.0544e-08	3.97995e-08	ADRA2B
1511	0	0.985	6.01474	5.01674e-09	3.72344e-09	CTSG
151126	0.01	0.11	4.33233	7.92531e-06	7.21978e-06	ZNF385B
151354	0.05	0.17	1.81539	4.16964e-05	4.02228e-05	FAM84A
1514	0.045	0.28	3.01474	0.000418274	0.000440762	CTSL
152206	0.055	0.285	2.27777	0.000214117	0.000219855	CCDC13
1524	0.01	0.15	4.1022	4.59613e-05	4.45247e-05	CX3CR1
153020	0.585	2.885	2.31358	1.99617e-40	5.63449e-41	RASGEF1B
153222	0.345	2.21	2.83717	4.72516e-84	6.99613e-85	CREBRF
155054	0.38	1.565	2.04634	2.05241e-21	9.40092e-22	ZNF425
157506	3.165	6.735	1.09006	3.77979e-43	1.00956e-43	RDH10
1577	11.895	27.145	1.12058	1.30693e-65	2.41167e-66	CYP3A5
158586	5.015	16.28	1.70023	6.04468e-284	2.73345e-285	ZXDB
159091	1.565	6.155	1.96346	3.20998e-42	8.74692e-43	FAM122C
162394	1.225	5.685	2.20684	5.92889e-159	4.66162e-160	SLFN5
162514	0.31	0.66	1.09491	7.72705e-08	6.15772e-08	TRPV3
1628	1.265	2.88	1.21875	8.97162e-11	6.10517e-11	DBP
162968	0.77	2.42	1.6295	4.08819e-26	1.62508e-26	ZNF497
163059	0.395	0.955	1.22647	5.64472e-06	5.08622e-06	ZNF433
163227	2.325	4.805	1.05043	4.96058e-33	1.65635e-33	ZNF100
163732	71.155	204.155	1.52161	0	0	CITED4
1649	8.03	18.57	1.17651	1.21573e-31	4.18705e-32	DDIT3
165904	0	0.065	4.82209	0.000120297	0.000120871	XIRP1
166929	16.2	34.62	1.10122	0	0	SGMS2
168455	4.955	27.555	2.47644	0	0	CCDC71L
170082	0.205	0.605	1.56561	7.7137e-07	6.54654e-07	TCEANC
1746	0.25	1.745	2.81224	2.62788e-24	1.10363e-24	DLX2
1780	0.12	0.33	1.50231	0.000881809	0.000964227	DYNC1I1
1794	0.005	0.075	4.01474	8.35741e-05	8.30222e-05	DOCK2
183	0.01	0.385	5.18466	6.78471e-10	4.82878e-10	AGT
1839	8.6	35.145	2.03244	0	0	HBEGF
1843	16.46	130.005	2.98305	0	0	DUSP1
1844	11.4	30.755	1.43585	2.42727e-126	2.42894e-127	DUSP2
1848	8.685	61.665	2.83273	0	0	DUSP6
1880	1.07	4.57	2.11907	2.00086e-35	6.30443e-36	GPR183
189	0.035	0.515	3.92163	1.09779e-07	8.81719e-08	AGXT
1917	0.015	0.23	4.1022	4.59613e-05	4.45247e-05	EEF1A2
1958	2.66	207.74	6.29001	0	0	EGR1
1959	0.08	9.195	6.97329	2.18403e-227	1.19472e-228	EGR2
196	6.86	18.425	1.42621	4.62804e-275	2.14684e-276	AHR
1960	0.215	0.59	1.50659	7.92087e-08	6.32027e-08	EGR3
196264	6.48	14.33	1.15179	5.69045e-99	7.31304e-100	MPZL3
1969	189.695	383.33	1.01808	0	0	EPHA2
1991	0	0.445	5.01474	3.71924e-05	3.57044e-05	ELANE
199692	2.2	5.275	1.29779	2.65022e-32	8.99223e-33	ZNF627
199720	0.66	2.445	1.86411	1.98215e-21	9.07331e-22	GGN
2	0	0.31	6.73966	1.13906e-13	6.83743e-14	A2M
201163	14.825	47.235	1.75234	0	0	FLCN
201895	1.895	4.77	1.3389	2.77634e-57	5.73471e-58	SMIM14
2022	0.03	0.27	3.33666	5.62405e-07	4.72467e-07	ENG
202333	0.01	0.08	2.71518	2.3613e-07	1.94064e-07	CMYA5
203228	1.9	6.93	1.8536	6.93127e-76	1.13242e-76	C9orf72
203522	1.845	3.935	1.115	1.59413e-26	6.27395e-27	INTS6L
2040	2.68	5.51	1.04259	6.47715e-27	2.51989e-27	STOM
2049	2.315	9.25	1.99907	7.36963e-151	6.05242e-152	EPHB3
2051	5.545	11.94	1.0997	2.94642e-73	4.93844e-74	EPHB6
2081	1.32	3.98	1.66315	2.38875e-109	2.79461e-110	ERN1
2117	12.855	24.785	1.01505	4.35706e-174	3.10797e-175	ETV3
2119	4.75	12.795	1.43204	1.46004e-126	1.45892e-127	ETV5
2150	31.205	168.835	2.43668	0	0	F2RL1
220032	0.175	0.355	1.05102	0.000442926	0.000468494	GDPD4
2207	0.05	2.15	5.47417	7.49944e-12	4.83752e-12	FCER1G
221037	5.33	14.54	1.45061	0	0	JMJD1C
221079	6.33	25.905	1.83995	0	0	ARL5B
221302	6.97	13.74	1.00761	2.73627e-39	7.90313e-40	ZUFSP
222696	0.545	0.985	1.12288	7.10252e-07	6.01022e-07	ZSCAN23
2242	0.29	0.66	1.24503	0.000117242	0.000117649	FES
2275	23.88	70.22	1.5584	1.22175e-284	5.50699e-286	FHL3
22822	28.315	240.02	3.08468	0	0	PHLDA1
22861	3.7	7.985	1.1014	7.69745e-70	1.34518e-70	NLRP1
22936	13.94	31.28	1.17146	1.55833e-273	7.25148e-275	ELL2
22943	421.805	1163.58	1.46512	0	0	DKK1
2309	15.93	32.54	1.05265	0	0	FOXO3
23099	3.29	14.4	2.13431	0	0	ZBTB43
23129	0.015	0.145	3.01474	1.78925e-05	1.67565e-05	PLXND1
23135	14.035	87.615	2.63703	0	0	KDM6B
23175	13.83	36.07	1.37834	0	0	LPIN1
23209	0	0.095	4.5997	0.000397477	0.000418045	MLC1
23211	14.605	29.695	1.0047	7.89879e-242	4.13648e-243	ZC3H4
23225	0.02	0.145	3.47417	9.76182e-08	7.82054e-08	NUP210
23237	0.46	2.25	2.28377	2.6409e-31	9.19172e-32	ARC
23268	13.42	49.3	1.8645	0	0	DNMBP
23345	0.095	0.23	1.36837	1.55769e-15	8.64365e-16	SYNE1
2335	0.055	0.235	2.16448	1.02022e-09	7.31913e-10	FN1
23411	8.375	20.31	1.28601	5.9359e-169	4.35542e-170	SIRT1
23412	125.005	264.7	1.08361	0	0	COMMD3
23429	13.76	30.715	1.15979	1.03567e-248	5.34812e-250	RYBP
23528	15.73	46.235	1.56395	0	0	ZNF281
23529	18.545	38.295	1.04672	2.48345e-103	3.02856e-104	CLCF1
2353	1.7	65.385	5.26663	0	0	FOS
2354	1.06	62.225	5.88698	0	0	FOSB
2355	29.86	76.16	1.27704	0	0	FOSL2
23645	80.91	801.325	3.30916	0	0	PPP1R15A
23764	20.23	109.995	2.47146	0	0	MAFF
23767	9.355	40.055	2.08422	0	0	FLRT3
2494	1.3	3.455	1.39847	1.82837e-44	4.76611e-45	NR5A2
255043	3.13	7.055	1.18125	5.6726e-22	2.55692e-22	TMEM86B
255394	0.135	1.455	3.2842	6.44613e-26	2.57929e-26	TCP11L2
256302	3.76	10.985	1.54824	2.50577e-142	2.21142e-143	NATD1
257068	0.925	2.495	1.44456	6.92929e-14	4.11597e-14	PLCXD2
257144	1.265	3.29	1.38013	1.46158e-28	5.4538e-29	GCSAM
25794	1.235	3.205	1.4224	2.86093e-44	7.47861e-45	FSCN2
25819	11.945	87.88	2.88059	0	0	NOCT
25822	1.66	5.59	1.77285	2.58708e-46	6.48725e-47	DNAJB5
25897	8.735	26.505	1.60113	0	0	RNF19A
25948	11.06	25.03	1.20606	2.3896e-150	1.96946e-151	KBTBD2
26136	59.77	120.035	1.00953	0	0	TES
26227	0.18	1.015	2.52375	8.67552e-12	5.6202e-12	PHGDH
26230	0.08	0.345	1.5688	0.000314238	0.00032729	TIAM2
26504	10.185	21.01	1.01914	3.42753e-129	3.3849e-130	CNNM4
26511	16.04	58.6	1.6568	3.34432e-227	1.83918e-228	CHIC2
26585	0.005	0.135	4.33666	7.64409e-06	6.95802e-06	GREM1
2669	4.195	49.785	3.54909	0	0	GEM
26959	3.34	12.17	1.83989	2.00757e-116	2.18466e-117	HBP1
27	5.15	10.85	1.07928	6.13557e-197	3.91121e-198	ABL2
27019	0.005	0.125	3.58512	0.00041957	0.000442199	DNAI1
27063	66.08	183.235	1.47248	0	0	ANKRD1
27115	0.005	0.06	3.42114	0.000502227	0.000533783	PDE7B
27289	3.325	14.565	2.13352	1.00237e-100	1.26479e-101	RND1
2729	17.69	50.48	1.50841	0	0	GCLC
27314	0.645	1.815	1.50235	1.02697e-47	2.51527e-48	RAB30
282618	0.855	3.415	2.0008	2.73011e-12	1.73159e-12	IFNL1
2827	0.855	4.46	2.38744	1.01723e-46	2.53149e-47	GPR3
283130	2.43	5.305	1.06884	1.31484e-24	5.47015e-25	SLC25A45
283431	1.275	3.41	1.48023	4.10783e-48	9.99503e-49	GAS2L3
283991	24.425	67.24	1.46197	5.65045e-263	2.71178e-264	UBALD2
284040	0	0.32	5.86524	2.72902e-08	2.11347e-08	CDRT4
284254	0.635	1.42	1.1654	3.95862e-06	3.52479e-06	DYNAP
284390	0.315	0.73	1.19931	6.46984e-05	6.35822e-05	ZNF763
286343	6.075	27.36	2.12622	2.14091e-260	1.04309e-261	LURAP1L
2886	10.665	49.42	2.2022	0	0	GRB7
290	0.325	0.915	1.48604	6.37537e-10	4.53373e-10	ANPEP
29015	0.01	0.24	4.5997	7.13492e-07	6.03972e-07	SLC43A3
29035	19.33	48.685	1.23982	0	0	C16orf72
29108	0.08	0.79	3.33666	4.05645e-05	3.90836e-05	PYCARD
29116	3.25	8.3	1.35785	2.90001e-57	5.99439e-58	MYLIP
29126	5.625	43.605	2.99411	0	0	CD274
2916	0.14	0.29	1.03437	0.000568667	0.000607964	GRM6
2959	12.5	38.835	1.63642	6.51908e-185	4.39343e-186	GTF2B
2995	0.025	0.41	4.18466	2.52265e-05	2.39301e-05	GYPC
29950	74.215	475.01	2.67936	0	0	SERTAD1
2996	2.29	5.47	1.25853	6.35114e-49	1.51754e-49	GYPE
3005	127.26	402.245	1.66148	0	0	H1F0
3006	7.625	18.28	1.26305	1.01115e-26	3.95151e-27	HIST1H1C
3012	0.715	3.5	2.29484	5.86513e-10	4.16318e-10	HIST1H2AE
3038	20.195	40.47	1.00416	2.062e-234	1.1039e-235	HAS3
3059	0.03	0.465	4.1022	1.02644e-08	7.75303e-09	HCLS1
3071	0	0.13	5.18466	1.16589e-05	1.07537e-05	NCKAP1L
308	2.305	16.22	2.81449	1.85326e-149	1.54094e-150	ANXA5
3097	0.64	2.23	1.80489	1.11006e-73	1.85245e-74	HIVEP2
3123	0	0.33	4.93217	6.24186e-05	6.12779e-05	HLA-DRB1
3157	30.315	98.775	1.69752	0	0	HMGCS1
3162	99.38	403.775	2.02373	0	0	HMOX1
3164	25.745	116.28	2.10808	0	0	NR4A1
3170	4.495	11.605	1.37028	7.51703e-64	1.4244e-64	FOXA2
3171	25.52	86.965	1.77021	0	0	FOXA3
3263	0.05	0.375	2.88921	5.56297e-05	5.43129e-05	HPX
3269	3.97	22.315	2.47856	0	0	HRH1
3310	0.61	16.23	4.73183	0	0	HSPA6
333932	0.385	1.745	2.17824	5.58024e-05	5.45029e-05	HIST2H3A
338376	2.185	5.16	1.23886	4.83182e-16	2.63255e-16	IFNE
3394	5.575	11.855	1.10643	8.3994e-52	1.90526e-52	IRF8
340351	0.09	0.29	1.65519	9.598e-06	8.80097e-06	AGBL3
3422	14.71	38.55	1.3858	2.29144e-263	1.09637e-264	IDI1
342357	1.35	2.895	1.10243	2.40652e-35	7.60718e-36	ZKSCAN2
342574	0.24	1.24	2.37731	7.6467e-11	5.18795e-11	KRT27
342931	0.71	2.425	1.33457	6.1964e-07	5.21634e-07	RFPL4A
3433	3.01	6.695	1.1546	1.87079e-41	5.15231e-42	IFIT2
344	0.115	1.855	4.01474	1.42591e-11	9.32892e-12	APOC2
345651	0.12	0.49	2.07363	5.82927e-07	4.90048e-07	ACTBL2
3491	51.14	115.855	1.18096	0	0	CYR61
353088	1.54	2.745	1.00819	2.45177e-17	1.27751e-17	ZNF429
353322	0.89	1.885	1.09055	0.000381616	0.000400193	ANKRD37
3563	0.37	1.59	2.03181	1.39798e-10	9.60701e-11	IL3RA
3570	2.75	10.415	2.23901	1.94653e-248	1.00801e-249	IL6R
3576	3.125	15.62	2.32478	1.22518e-123	1.25283e-124	CXCL8
3587	0.05	0.335	2.69923	3.20851e-08	2.49604e-08	IL10RA
3598	0.22	0.77	1.80323	6.54474e-05	6.43374e-05	IL13RA2
3624	0.4	19.85	5.8435	0	0	INHBA
3638	12.535	44.435	1.82681	0	0	INSIG1
3667	13.905	56.5	2.02385	0	0	IRS1
3674	0.01	0.145	4.1022	4.59613e-05	4.45247e-05	ITGA2B
3684	0.16	0.35	1.10132	0.000659039	0.000709292	ITGAM
3689	0.34	2.655	2.96515	1.47452e-48	3.55763e-49	ITGB2
3695	0.205	0.59	1.52931	8.72342e-06	7.97611e-06	ITGB7
3725	70.66	268.615	1.92791	0	0	JUN
3726	57.88	152.775	1.40147	0	0	JUNB
3727	56.88	127.875	1.16998	0	0	JUND
375387	0	0.215	5.33666	3.71127e-06	3.29697e-06	NRROS
3769	0.06	0.255	2.05913	4.88113e-05	4.73853e-05	KCNJ13
377630	0.08	0.625	2.97571	2.18795e-07	1.7921e-07	USP17L2
3798	0.055	0.305	2.441	3.09998e-07	2.56987e-07	KIF5A
384	13.57	27.395	1.01455	9.58587e-76	1.56752e-76	ARG2
388	72.865	170.005	1.22356	0	0	RHOB
388015	0.025	0.555	4.42413	2.66662e-20	1.26266e-20	RTL1
388403	0.395	0.975	1.29484	5.60412e-12	3.59941e-12	YPEL2
388436	0	0.235	4.89836	7.66033e-05	7.58627e-05	LOC388436
388558	1.765	4.375	1.30642	1.00682e-35	3.14151e-36	ZNF808
389384	0.845	1.685	1.04631	1.04196e-10	7.10268e-11	C6orf222
389432	15.095	31.045	1.04012	4.81504e-285	2.16334e-286	SAMD5
389692	1.255	4.525	1.85018	3.50632e-38	1.03421e-38	MAFA
390	30.24	62.965	1.0611	2.83919e-258	1.39158e-259	RND3
392188	0.01	0.37	5.4363	1.64808e-06	1.4302e-06	USP17L8
392197	0	0.295	5.0877	2.29073e-05	2.165e-05	USP17L7
3931	7.315	20.795	1.50847	1.19522e-72	2.02421e-73	LCAT
3949	73.335	152.115	1.05681	0	0	LDLR
3976	30.435	74.98	1.3038	0	0	LIF
399694	0.04	0.53	3.88921	1.31474e-19	6.38451e-20	SHC4
4005	0.015	0.205	3.5997	0.000933443	0.00102423	LMO2
400745	2.295	14.905	2.72907	0	0	SH2D5
400966	0.785	2.03	1.36873	2.18035e-31	7.57289e-32	RGPD1
401447	0	0.43	5.66032	2.20581e-07	1.8077e-07	USP17L1
401565	0.59	1.585	1.3393	2.43058e-05	2.30214e-05	FAM166A
401934	10.095	26.995	1.30459	7.39735e-108	8.7405e-109	RNF223
4023	0	0.08	4.47417	0.000725003	0.000784305	LPL
402569	0.745	1.72	1.15465	1.60198e-06	1.38833e-06	KPNA7
4045	0.06	0.185	1.47405	1.49059e-05	1.38725e-05	LSAMP
406	2.41	5.13	1.07686	2.55148e-23	1.10541e-23	ARNTL
4071	204.765	682.835	1.73871	0	0	TM4SF1
4084	7.9	26.04	1.72266	0	0	MXD1
4117	0.36	0.92	1.24564	6.59984e-08	5.2373e-08	MAK
4130	0.115	0.28	1.3906	2.66959e-08	2.06549e-08	MAP1A
414060	0.245	0.75	1.82112	1.23388e-07	9.94447e-08	TBC1D3C
415116	64.43	129.88	1.01245	0	0	PIM3
4170	167.305	722.905	2.11436	0	0	MCL1
4185	0.195	0.875	2.16158	1.9819e-19	9.67638e-20	ADAM11
4306	0.205	0.62	1.6306	4.23697e-12	2.70772e-12	NR3C2
4314	6.705	34.655	2.37175	0	0	MMP3
431705	0.32	4.99	4.0504	4.8464e-103	5.95259e-104	ASTL
4319	9.205	52.87	2.52266	0	0	MMP10
4321	0.09	0.695	2.98436	2.79621e-09	2.04558e-09	MMP12
440689	0.785	2.52	1.51565	0.000184644	0.000188273	HIST2H2BF
441430	0	0.195	5.30752	4.65967e-06	4.17077e-06	ANKRD20A2
441478	15.05	32.84	1.12724	5.35186e-143	4.68416e-144	NRARP
4493	0.11	0.99	3.17178	0.000143423	0.000145008	MT1E
4501	35.73	188.87	2.40357	0	0	MT1X
4502	214.38	777.25	1.85946	0	0	MT2A
4524	5.52	14.95	1.41557	1.18277e-218	6.69432e-220	MTHFR
4609	145.825	388.63	1.41539	0	0	MYC
4665	22.485	70.715	1.675	0	0	NAB2
467	25.12	74.93	1.59044	0	0	ATF3
4739	35.835	87.835	1.27004	0	0	NEDD9
4773	4.065	10.705	1.38514	4.36755e-180	3.02626e-181	NFATC2
4776	0.03	0.18	3.18466	3.20408e-06	2.83097e-06	NFATC4
4783	7.02	22.965	1.71944	5.85403e-146	4.95289e-147	NFIL3
4861	3.15	7.345	1.20089	2.00532e-20	9.44846e-21	NPAS1
4923	0.495	1.23	1.28102	2.62341e-11	1.73931e-11	NTSR1
4929	0.24	1.61	2.60675	4.94248e-31	1.72962e-31	NR4A2
493911	0.75	2.195	1.432	3.95549e-07	3.29582e-07	PHOSPHO2
4995	0.06	0.24	1.9497	0.000261238	0.00027003	OR3A2
50640	5.995	13.325	1.15859	3.77182e-107	4.48969e-108	PNPLA8
51278	52.865	163.745	1.63224	0	0	IER5
51307	14.895	34.755	1.22348	2.09496e-287	9.35132e-289	FAM53C
51333	1.74	4.275	1.29853	4.13857e-14	2.42871e-14	ZNF771
51393	0.035	0.195	3.18466	0.000130664	0.000131612	TRPV2
51429	0	0.12	4.47417	0.000725003	0.000784305	SNX9
51447	49.135	100.485	1.06195	1.06403e-249	5.41695e-251	IP6K2
51477	0.975	2.18	1.16475	2.06867e-09	1.50399e-09	ISYNA1
51526	23.81	69.98	1.52824	0	0	OSER1
51646	15.815	36.095	1.25113	7.45369e-172	5.40385e-173	YPEL5
51702	0.285	0.57	1.08749	0.000513927	0.000546668	PADI3
5187	1.165	5.31	2.19258	5.33803e-109	6.26055e-110	PER1
5224	0.945	3.64	1.94112	5.57288e-13	3.43546e-13	PGAM2
5228	0.06	0.535	3.22419	4.52131e-08	3.5503e-08	PGF
5274	0.47	1.825	1.94074	5.64792e-13	3.48419e-13	SERPINI1
5292	23.055	85.21	1.88717	0	0	PIM1
53349	8.64	23.93	1.46262	3.54299e-249	1.8244e-250	ZFYVE1
5341	0.03	0.285	3.33666	5.62405e-07	4.72467e-07	PLEK
5366	3.625	32.985	3.18838	0	0	PMAIP1
5368	0	0.28	4.47417	0.000725003	0.000784305	PNOC
54101	11.245	27.285	1.28001	1.93298e-214	1.11942e-215	RIPK4
54149	2.175	4.5	1.05221	1.41916e-37	4.25006e-38	C21orf91
54206	215.41	725.2	1.75074	0	0	ERRFI1
54209	0.08	1.135	4.22419	1.73573e-09	1.25965e-09	TREM2
54386	10.855	22.935	1.08031	5.15364e-78	8.11919e-79	TERF2IP
54442	54.78	121.65	1.15221	0	0	KCTD5
54498	42.07	113.955	1.41586	0	0	SMOX
54507	0.275	1.045	1.93069	2.21563e-16	1.191e-16	ADAMTSL4
54532	14.39	36.855	1.3468	0	0	USP53
54541	9.445	28.635	1.6013	9.9065e-141	8.82952e-142	DDIT4
54567	0.985	7.77	2.9794	1.39555e-161	1.08301e-162	DLL4
54800	0.69	3.135	1.97743	2.71197e-78	4.26065e-79	KLHL24
54811	9.29	21.675	1.2476	1.25919e-264	6.00641e-266	ZNF562
54826	0.84	1.935	1.2108	8.09605e-14	4.82437e-14	GIN1
55088	4.025	8.795	1.07667	8.05893e-90	1.12151e-90	CCDC186
55105	7.305	16.485	1.04896	5.0242e-76	8.17913e-77	GPATCH2
55122	19.74	39.535	1.00285	7.59408e-105	9.18343e-106	AKIRIN2
55150	0.96	2.505	1.38554	1.21997e-05	1.12721e-05	C19orf73
55166	2.715	5.5	1.01474	1.06025e-14	6.09834e-15	CENPQ
55196	10.925	40.305	1.88572	0	0	KIAA1551
55281	0.15	0.52	1.78696	5.93701e-05	5.81379e-05	TMEM140
552891	0.115	0.54	2.25615	5.10943e-05	4.96985e-05	DNAJC25-GNG10
55361	11.295	29.96	1.40827	2.40285e-294	1.06555e-295	PI4K2A
554313	1.985	6.725	1.76255	2.38779e-09	1.74157e-09	HIST2H4B
55432	7.265	16.4	1.17568	1.74455e-182	1.19353e-183	YOD1
55454	5.47	21.045	1.9349	2.41319e-283	1.0983e-284	CSGALNACT2
55502	9.465	24.865	1.39501	7.72158e-84	1.14552e-84	HES6
55512	0.105	0.335	1.58515	5.85266e-06	5.28213e-06	SMPD3
5552	0.71	1.65	1.21272	4.86433e-06	4.35821e-06	SRGN
55602	7.89	17.625	1.16077	3.38702e-110	3.91802e-111	CDKN2AIP
55608	19.34	37.75	1.03138	7.33017e-117	7.93402e-118	ANKRD10
55609	1.81	4.145	1.19832	1.22037e-35	3.82563e-36	ZNF280C
55692	31.455	72.545	1.11377	2.0747e-182	1.42242e-183	LUC7L
55723	15.445	38.825	1.33107	2.94931e-144	2.55123e-145	ASF1B
55769	5.52	18.16	1.69424	7.55577e-157	5.97384e-158	ZNF83
5579	0.015	0.09	2.50458	0.000915455	0.00100315	PRKCB
558	1.66	7.205	2.04841	1.8504e-123	1.89486e-124	AXL
55811	0.035	0.135	1.77098	0.000874035	0.000955217	ADCY10
55840	1.54	3.705	1.3065	1.46356e-09	1.05851e-09	EAF2
55917	8.41	18.625	1.15654	8.5337e-175	6.02502e-176	CTTNBP2NL
55924	2.125	4.275	1.00589	2.01384e-36	6.19257e-37	FAM212B
55957	10.885	22.475	1.04716	3.32075e-39	9.61066e-40	LIN37
56033	0.02	0.39	4.40705	4.21592e-06	3.76435e-06	BARX1
56155	0.03	0.785	4.80133	5.07313e-33	1.69468e-33	TEX14
56180	8.215	35.515	2.14144	0	0	MOSPD1
56204	1.8	8.725	2.27756	1.86255e-172	1.34761e-173	FAM214A
56242	3.465	7.145	1.04531	9.6562e-26	3.87782e-26	ZNF253
56261	3.18	17.39	2.44621	0	0	GPCPD1
5629	0.35	1.69	2.2645	3.70315e-63	7.1143e-64	PROX1
56302	0.115	0.51	2.14453	1.5055e-07	1.21951e-07	TRPV5
5649	0.025	0.37	3.84071	2.63471e-33	8.70517e-34	RELN
566	0.12	0.815	2.76962	1.30356e-05	1.20805e-05	AZU1
56650	22.965	46	1.02129	3.63627e-145	3.10834e-146	CLDND1
5676	0.2	0.72	1.81616	4.84046e-06	4.33541e-06	PSG7
56833	0	0.17	5.01474	3.71924e-05	3.57044e-05	SLAMF8
56929	6.115	28.035	2.19791	0	0	FEM1C
56975	0.015	0.165	3.26266	7.26203e-05	7.17594e-05	FAM20C
57089	9.775	21.825	1.15945	0	0	ENTPD7
571	5.75	23.545	2.0345	0	0	BACH1
57132	24.1	75.625	1.65098	0	0	CHMP1B
57161	1.21	2.61	1.09452	1.24987e-24	5.19074e-25	PELI2
57162	5.885	18.915	1.68501	2.08072e-206	1.24747e-207	PELI1
57205	0.28	1.015	1.86536	1.69872e-22	7.53801e-23	ATP10D
5742	0.075	0.265	1.98672	9.11129e-07	7.76589e-07	PTGS1
5743	1	5.12	2.35909	7.66404e-110	8.88792e-111	PTGS2
574414	5.735	26.225	2.19531	1.10078e-137	1.0084e-138	PRR9
57559	10.415	21.105	1.02285	5.97193e-63	1.14991e-63	STAMBPL1
57561	0.675	8.905	3.72156	1.45598e-272	6.79641e-274	ARRDC3
57576	0.155	1.08	2.57767	5.18095e-20	2.48419e-20	KIF17
57608	3.34	8.825	1.40113	9.8879e-192	6.47628e-193	KIAA1462
57685	1.005	4.095	2.02756	1.0039e-85	1.46442e-86	CACHD1
57688	6.33	16.075	1.33766	8.23818e-172	5.98461e-173	ZSWIM6
57701	1.44	3.76	1.39881	4.20781e-44	1.10485e-44	NCKAP5L
57731	0.19	0.895	1.86218	1.8875e-15	1.05013e-15	SPTBN4
5794	9.825	32.145	1.77083	0	0	PTPRH
5801	0.03	0.18	2.5997	0.00051871	0.000552133	PTPRR
58476	23.665	85.865	1.85949	0	0	TP53INP2
58515	24.19	62.23	1.36424	4.75289e-112	5.37322e-113	SELK
59344	1.61	13.625	3.04724	4.45246e-267	2.09787e-268	ALOXE3
59348	4.575	9.25	1.02421	1.04562e-32	3.50965e-33	ZNF350
5959	4.1	10.36	1.3381	3.88288e-31	1.35428e-31	RDH5
5989	6.385	14.515	1.18769	8.18727e-116	8.95728e-117	RFX1
5997	15.425	112.395	2.86654	0	0	RGS2
5999	0.025	0.17	2.6777	0.000299046	0.000310769	RGS4
6016	5.415	12.415	1.19963	5.03703e-79	7.84732e-80	RIT1
6036	0	0.57	4.89052	8.03467e-05	7.96638e-05	RNASE2
60370	14.87	47.44	1.67433	3.22604e-200	2.02826e-201	AVPI1
604	1.205	5.935	2.00736	1.77659e-83	2.65117e-84	BCL6
6121	0.94	3.825	2.01101	2.83462e-42	7.71996e-43	RPE65
6236	0.395	2.87	2.86082	1.68809e-25	6.83088e-26	RRAD
6303	155.675	765.78	2.2765	0	0	SAT1
6304	0	0.135	5.33666	3.71127e-06	3.29697e-06	SATB1
6320	0	0.86	6.47417	9.73123e-12	6.31689e-12	CLEC11A
6345	0.095	0.525	2.44381	1.95057e-12	1.22777e-12	SRL
638	9.18	19.58	1.09441	3.09022e-30	1.10261e-30	BIK
63827	1.49	12.475	3.05249	6.65751e-231	3.62239e-232	BCAN
6383	0.02	0.525	5.08083	4.55664e-17	2.39688e-17	SDC2
639	1.29	7.685	2.5527	8.3861e-193	5.44371e-194	PRDM1
63925	13.4	27.385	1.04177	2.37751e-176	1.66471e-177	ZNF335
6404	0.85	4.37	2.36523	4.4323e-54	9.63365e-55	SELPLG
64063	61.03	258.575	2.08461	0	0	PRSS22
64084	0.025	0.105	1.65354	0.000298957	0.000310632	CLSTN2
64089	2.915	6.05	1.05415	6.00441e-30	2.15642e-30	SNX16
64112	9.385	19.39	1.04771	7.8814e-70	1.37962e-70	MOAP1
641339	1.03	2.15	1.06137	2.24398e-13	1.36401e-13	ZNF674
642273	1.685	3.14	1.04761	5.6741e-14	3.35218e-14	FAM110C
643365	0.07	1.24	4.22419	1.71446e-17	8.86833e-18	LINC00452
6434	101.795	226.565	1.14602	0	0	TRA2B
6446	20.76	68.075	1.71078	0	0	SGK1
644815	25.19	68.795	1.442	0	0	FAM83G
645864	0.125	0.825	2.88921	4.2702e-12	2.72958e-12	MAGEB17
64651	8.02	65.26	3.03763	0	0	CSRNP1
64782	43.27	112.69	1.37928	0	0	AEN
64783	5.685	16.085	1.48835	1.8929e-139	1.6954e-140	RBM15
64859	7.375	82.995	3.32328	0	0	NABP1
6498	30.35	77.985	1.35788	0	0	SKIL
650	14.595	33.455	1.19808	2.62817e-194	1.69837e-195	BMP2
65117	30.78	70.505	1.19082	3.57755e-287	1.60214e-288	RSRC2
6514	0	0.17	5.1022	2.07809e-05	1.95494e-05	SLC2A2
6520	173.395	358.305	1.03303	0	0	SLC3A2
65251	0.11	0.3	1.45996	0.000883219	0.000966088	ZNF649
65266	0.175	0.37	1.22886	0.000197381	0.000201836	WNK4
65268	0.025	0.105	1.9992	0.000247761	0.000255703	WNK2
653192	0.035	0.345	3.33666	4.05645e-05	3.90836e-05	TRIM43B
65981	47.835	119.35	1.36681	0	0	CAPRIN2
6615	13.14	75.36	2.52074	0	0	SNAI1
664	0.035	0.25	2.84352	0.00089171	0.000975964	BNIP3
6659	21.725	93.825	2.11157	0	0	SOX4
6688	0.04	0.57	3.96893	6.06714e-08	4.79776e-08	SPI1
6696	0.285	1.675	2.55663	1.81053e-15	1.00651e-15	SPP1
6698	1.33	4.02	1.61658	9.6495e-09	7.28153e-09	SPRR1A
677	73.505	257.945	1.81204	0	0	ZFP36L1
6809	42.4	120.935	1.54324	0	0	STX3
6818	0	8.59	9.77516	1.04547e-74	1.72789e-75	SULT1A3
688	81.7	419.78	2.3913	0	0	KLF5
6880	44.985	99.065	1.17345	4.41681e-226	2.44188e-227	TAF9
694	6.11	69.59	3.51158	0	0	BTG1
7071	30.21	115.445	1.93681	0	0	KLF10
7128	37.115	170.295	2.21207	0	0	TNFAIP3
7161	0.09	0.225	1.40705	0.000422768	0.00044594	TP73
723790	4.835	21.225	2.13459	1.07954e-45	2.7448e-46	HIST2H2AA4
7262	123.775	343.06	1.47192	0	0	PHLDA2
728	0.235	0.605	1.40204	0.000102459	0.000102402	C5AR1
728392	0.99	3.185	1.68611	8.98742e-16	4.93863e-16	LOC728392
728498	0	0.09	5.18546	1.15916e-05	1.06899e-05	GOLGA8H
728747	0.46	1.435	1.65014	2.51541e-16	1.35397e-16	ANKRD20A4
729767	2.595	5.99	1.2092	1.14025e-18	5.68189e-19	CEACAM18
729857	1.92	4.47	1.12507	1.1741e-43	3.10853e-44	RGPD2
729974	0	0.6	5.33522	3.75324e-06	3.3359e-06	RFPL4AL1
730094	2.85	7.435	1.38347	3.10183e-76	5.01794e-77	C16orf52
7305	0.15	1.665	3.55906	3.02761e-08	2.35045e-08	TYROBP
730755	4.725	28.99	2.61902	8.73204e-132	8.36867e-133	KRTAP2-3
7316	384.19	1763.74	2.20006	0	0	UBC
7321	10.38	22.865	1.13944	3.6401e-103	4.46034e-104	UBE2D1
7357	8.715	25.995	1.62361	8.98585e-284	4.07657e-285	UGCG
7378	14.44	29.755	1.04295	8.47447e-59	1.71584e-59	UPP1
7421	1.795	3.77	1.08834	3.36912e-29	1.23259e-29	VDR
7425	0.25	2.465	3.34916	3.90302e-44	1.02368e-44	VGF
7433	1.225	2.765	1.16448	5.72454e-15	3.24837e-15	VIPR1
7456	0	0.07	4.47417	0.000725003	0.000784305	WIPF1
7465	17.39	60.195	1.79223	0	0	WEE1
7483	0.01	0.21	4.01474	3.35112e-08	2.61187e-08	WNT9A
7508	10.73	25.015	1.23161	5.05796e-177	3.52679e-178	XPC
7538	102.69	291.035	1.50417	0	0	ZFP36
7539	0.215	0.535	1.32406	9.45796e-05	9.42172e-05	ZFP37
7586	4.935	13.325	1.46107	2.69448e-300	1.16737e-301	ZKSCAN1
7691	2.78	5.63	1.02062	2.19006e-25	8.90045e-26	ZNF132
7709	8.07	16.53	1.03	3.35311e-64	6.32932e-65	ZBTB17
7718	7.905	33.65	2.12474	1.22497e-249	6.27201e-251	ZNF165
7745	4.55	9.17	1.00925	7.23883e-94	9.64083e-95	ZKSCAN8
7746	4.615	9.705	1.1033	5.79699e-30	2.08024e-30	ZSCAN9
7763	23.71	72.625	1.6176	0	0	ZFAND5
7779	17.365	43.535	1.32701	1.01948e-187	6.76653e-189	SLC30A1
7798	21.875	51.225	1.23096	0	0	LUZP1
7803	71.295	242.71	1.70446	0	0	PTP4A1
7805	0.09	1.5	4.13812	1.4806e-27	5.67378e-28	LAPTM5
7832	32.62	66.975	1.03895	4.5996e-262	2.22087e-263	BTG2
79003	10.325	24.61	1.19574	1.11439e-107	1.31836e-108	MIS12
79027	29.14	70.74	1.04099	1.84581e-211	1.0824e-212	ZNF655
79145	16.11	32.56	1.01166	1.13106e-89	1.57566e-90	CHCHD7
79165	19.91	61.26	1.62217	1.64721e-161	1.28071e-162	LENG1
79363	2.04	4.075	1.0085	3.62419e-10	2.5445e-10	RSG1
79669	49.175	110.435	1.16504	0	0	C3orf52
79725	0.525	1.085	1.03897	4.86023e-08	3.82351e-08	THAP9
79812	0.875	3.03	1.78897	6.37527e-63	1.22851e-63	MMRN2
79845	1.205	5.82	2.27557	7.28335e-50	1.71372e-50	RNF122
7988	6.005	13.285	1.14887	8.1468e-64	1.54611e-64	ZNF212
79919	17.19	103.17	2.59683	0	0	C2orf54
79957	1.645	6	1.97061	1.47629e-67	2.65313e-68	PAQR6
79973	0.215	0.565	1.34762	0.000262194	0.000271096	ZNF442
79999	0	0.33	5.38769	2.46921e-06	2.16295e-06	LOC79999
80032	1.2	2.465	1.03714	3.21549e-07	2.66798e-07	ZNF556
80117	0.705	21.51	4.9329	2.20958e-238	1.17002e-239	ARL14
8013	0.115	1.2	3.31753	7.04021e-43	1.89272e-43	NR4A3
80176	5.23	15.795	1.59569	2.94373e-139	2.64088e-140	SPSB1
80219	10.77	26.42	1.3177	7.87201e-125	7.98079e-126	COQ10B
80264	4.215	9.345	1.14953	1.89585e-63	3.62008e-64	ZNF430
80271	36.26	202.885	2.45361	0	0	ITPKC
80311	1.395	2.975	1.09781	1.52397e-31	5.27087e-32	KLHL15
80314	4.985	13.065	1.3956	1.11851e-124	1.1356e-125	EPC1
80315	6.755	15.13	1.16895	6.80333e-202	4.26742e-203	CPEB4
8061	77.67	295.89	1.93655	0	0	FOSL1
80820	1.81	3.94	1.09779	3.67382e-26	1.45875e-26	EEPD1
81025	0.01	0.165	3.82209	0.000280145	0.000290473	GJA9
81558	1.99	7.735	1.74173	1.94229e-61	3.82776e-62	FAM117A
81618	0.085	0.55	2.82209	4.53996e-08	3.56692e-08	ITM2C
81631	34.445	86.935	1.33687	0	0	MAP1LC3B
81704	0.065	0.27	2.15224	4.42919e-09	3.27556e-09	DOCK8
8178	7.835	16.04	1.02272	5.87014e-92	7.97211e-93	ELL
81848	8.27	44.16	2.39938	0	0	SPRY4
8214	0	0.37	5.00478	3.96373e-05	3.81613e-05	DGCR6
8334	4.22	20.08	2.2516	3.02215e-47	7.45479e-48	HIST1H2AC
8337	4.835	21.225	2.13459	1.07954e-45	2.7448e-46	HIST2H2AA3
8349	1.715	5.96	1.79588	6.27621e-45	1.61866e-45	HIST2H2BE
8351	0.47	5.015	3.41636	4.91102e-32	1.67921e-32	HIST1H3D
8353	0.315	1.595	2.33666	0.000127557	0.000128426	HIST1H3E
83546	0.1	0.385	2.20731	7.07664e-05	6.98242e-05	RTBDN
8357	0.555	2.675	2.27108	9.29292e-07	7.92884e-07	HIST1H3H
83638	19.4	69.645	1.84485	0	0	C11orf68
8365	0.16	1.855	3.5383	6.92517e-06	6.28848e-06	HIST1H4H
83667	9.1	29.59	1.70212	0	0	SESN2
8370	1.985	6.725	1.76255	2.38779e-09	1.74157e-09	HIST2H4A
83755	0.025	1.61	5.9624	4.75432e-16	2.58894e-16	KRTAP4-12
83857	0.125	0.26	1.10465	3.58578e-05	3.43813e-05	TMTC1
83881	0.12	0.39	1.71997	0.000728829	0.000788763	MIXL1
83886	0.29	0.825	1.56493	0.000170916	0.000173776	PRSS27
83896	5.825	51.465	3.14435	7.72804e-192	5.05036e-193	KRTAP3-1
83897	0	2.29	6.92163	3.60338e-15	2.02738e-15	KRTAP3-2
83983	0.53	1.145	1.11427	0.000445388	0.000471424	TSSK6
84002	9.765	27.77	1.50136	1.50881e-297	6.60286e-299	B3GNT5
84060	4.925	12.745	1.16344	1.30437e-51	2.97016e-52	RBM48
84124	10.965	22.56	1.08886	5.12695e-76	8.35387e-77	ZNF394
84307	1.24	3.435	1.06364	9.99174e-33	3.35231e-33	ZNF397
8444	3.465	7.42	1.04226	4.49863e-40	1.2744e-40	DYRK3
84456	1.395	3.74	1.40674	2.27476e-38	6.67634e-39	L3MBTL3
84541	1.08	4.285	1.97365	3.15827e-76	5.11385e-77	KBTBD8
84612	5.685	36.015	2.66461	0	0	PARD6B
84617	0.19	0.555	1.56431	0.000224792	0.000231308	TUBB6
84659	0.09	0.57	2.647	5.2325e-06	4.70029e-06	RNASE7
84665	0.06	0.43	2.88921	1.24407e-15	6.88744e-16	MYPN
84674	3.175	6.81	1.10884	7.2181e-45	1.86789e-45	CARD6
84708	0.78	3.93	2.32137	1.58308e-62	3.07829e-63	LNX1
84803	13.785	29.695	1.1122	7.37186e-131	7.12961e-132	GPAT3
8482	16.545	35.88	1.1181	4.87678e-198	3.10167e-199	SEMA7A
84879	8.26	19.95	1.27758	1.94351e-85	2.84357e-86	MFSD2A
8493	5.05	10.1	1.00151	5.28891e-67	9.55129e-68	PPM1D
84952	0.065	0.19	1.4561	6.04643e-05	5.93153e-05	CGNL1
84953	4.48	10.185	1.18699	1.45473e-56	3.0388e-57	MICALCL
85004	0	0.145	4.5997	0.000397477	0.000418045	RERG
85285	0.035	6.13	7.35459	2.49508e-37	7.53043e-38	KRTAP4-1
85364	19.74	41.58	1.07596	3.18702e-176	2.23617e-177	ZCCHC3
85450	6.785	20.35	1.58662	0	0	ITPRIP
85458	0.87	2.71	1.5755	2.75727e-39	7.97182e-40	DIXDC1
85463	1.44	2.945	1.02531	4.44191e-39	1.28943e-39	ZC3H12C
8553	44.57	176.695	1.98848	0	0	BHLHE40
857	0.3	1.045	1.81497	8.7886e-11	5.97806e-11	CAV1
8601	0.055	0.285	2.5997	0.00051871	0.000552133	RGS20
8613	2.365	6.1	1.36729	2.01608e-46	5.04662e-47	PLPP3
8637	0.815	2.24	1.46006	2.74703e-05	2.61428e-05	EIF4EBP3
8647	0.01	0.175	4.5997	7.13492e-07	6.03972e-07	ABCB11
8651	1.94	5.665	1.54786	1.50301e-19	7.31195e-20	SOCS1
8727	28.325	68.875	1.29609	0	0	CTNNAL1
8780	18.175	45.8	1.33738	0	0	RIOK3
8848	28.49	223.935	2.78414	0	0	TSC22D1
885	5.63	15.835	1.46605	1.79081e-31	6.20163e-32	CCK
8867	3.065	8.585	1.48661	2.84913e-152	2.31911e-153	SYNJ1
8870	100.455	402.905	2.0051	0	0	IER3
8878	344.725	1143.04	1.74911	0	0	SQSTM1
8915	12.105	56.42	2.24793	0	0	BCL10
8938	0.145	0.325	1.1838	0.000432837	0.000457192	BAIAP3
8971	54.245	124.46	1.19924	0	0	H1FX
89858	0.47	1.01	1.12326	0.00015839	0.000160695	SIGLEC12
901	4.13	21.545	2.39652	9.70097e-279	4.44345e-280	CCNG2
9020	5.5	11.72	1.09548	2.53079e-84	3.73605e-85	MAP3K14
9021	7.065	14.195	1.0076	2.50363e-54	5.4161e-55	SOCS3
904	7.32	15.56	1.10444	1.00735e-169	7.36197e-171	CCNT1
905	7.87	18.375	1.08007	6.31742e-145	5.40945e-146	CCNT2
90634	0.295	0.8	1.29767	1.45705e-05	1.35518e-05	N4BP2L1
9080	0.555	1.19	1.10187	1.90544e-05	1.78723e-05	CLDN9
90835	0.785	1.69	1.08999	2.29111e-06	2.00326e-06	CCDC189
90865	2.53	7.47	1.5658	8.9541e-55	1.92528e-55	IL33
90874	6.725	23.75	1.80833	0	0	ZNF697
91156	0.05	0.13	1.42977	4.21176e-05	4.06476e-05	IGFN1
9162	0.045	0.14	1.76476	0.000102385	0.000102306	DGKI
9173	0.085	0.965	3.63639	2.19805e-28	8.24038e-29	IL1RL1
91749	1.465	3.005	1.03924	1.85561e-18	9.29527e-19	MFSD4B
91947	0.94	2.93	1.64006	3.60389e-36	1.11451e-36	ARRDC4
920	0.27	0.545	1.11427	0.000445388	0.000471424	CD4
9205	3.54	10.295	1.30589	2.89834e-50	6.74351e-51	ZMYM5
9214	1.155	4.16	1.95155	8.24566e-35	2.63297e-35	FCMR
92162	0.75	8.305	3.62677	3.85682e-54	8.36597e-55	TMEM88
92241	0.005	0.09	3.94427	3.48576e-05	3.33868e-05	RCSD1
9248	0.86	2.585	1.5798	7.95159e-18	4.07017e-18	GPR50
9263	22.12	46.345	1.09791	7.4449e-210	4.39834e-211	STK17A
92797	0.655	1.34	1.02354	8.81473e-10	6.30572e-10	HELB
93058	4.235	8.905	1.05396	1.43704e-22	6.36422e-23	COQ10A
9314	38.57	86.605	1.16532	0	0	KLF4
93233	0.13	0.465	2.12446	8.39204e-08	6.70724e-08	CCDC114
93953	0.535	1.11	1.04125	5.53587e-06	4.9833e-06	ACRC
9399	2.445	5.2	1.09779	4.15588e-18	2.10665e-18	STOML1
94031	0.03	0.21	2.7517	0.000171367	0.000174285	HTRA3
9411	16.475	46.67	1.50062	0	0	ARHGAP29
9424	0.885	2.135	1.02927	5.44311e-08	4.29159e-08	KCNK6
9444	0.01	0.13	3.26266	7.26203e-05	7.17594e-05	QKI
9456	4.51	13.16	1.55723	1.80966e-157	1.4255e-158	HOMER1
9518	104.095	707.21	2.76561	0	0	GDF15
9531	31.795	67.375	1.08601	2.14617e-271	1.00495e-272	BAG3
9534	0.595	1.245	1.17432	7.28486e-11	4.93821e-11	ZNF254
9572	5.415	47.455	3.13261	0	0	NR1D1
9587	23.3	50.93	1.12731	2.49062e-107	2.95738e-108	MAD2L1BP
9592	70.99	164.92	1.21715	0	0	IER2
963	0.04	0.495	3.82209	3.58507e-07	2.98143e-07	CD53
96459	4.235	11.955	1.49726	1.68602e-204	1.02313e-205	FNIP1
972	0.095	0.845	3.15224	3.63996e-09	2.67663e-09	CD74
9722	0.965	2.155	1.17759	1.09617e-18	5.45266e-19	NOS1AP
9764	1.925	4.13	1.14292	2.28219e-42	6.20212e-43	KIAA0513
9766	5.175	11.32	1.12726	2.16299e-100	2.73557e-101	SUSD6
9819	13.925	49.27	1.82319	0	0	TSC22D2
9866	0.565	1.75	1.56546	1.78366e-50	4.13438e-51	TRIM66
9901	0.22	0.435	1.06901	9.32097e-06	8.5415e-06	SRGAP3
9902	0.02	0.24	4.04448	7.90734e-12	5.10986e-12	MRC2
9955	0.055	0.4	2.95561	1.38587e-11	9.06084e-12	HS3ST3A1
9957	3.635	11.05	1.44134	8.96282e-54	1.95985e-54	HS3ST1
